# Supplementary material for: Ultra-trace elemental determination of Si by means of graphite furnace-atomic absorption spectrometry
Source: Royal Society of Chemistry journal article supplement (doi:10.1039/d4ja00360h), 2024-12-04
Supplement: d4ja00360h1.pdf [file d4ja00360h1.pdf]

|                                                                                                                                                                 |                                                                                                                                  |
|-----------------------------------------------------------------------------------------------------------------------------------------------------------------|----------------------------------------------------------------------------------------------------------------------------------|
| <b>Supplementary Information</b><br>Raw data of<br><b>Ultra-trace elemental determination of Si by means of graphite furnace-atomic absorption spectrometry</b> | <br><b>EVONIK</b><br>Leading Beyond Chemistry |
|-----------------------------------------------------------------------------------------------------------------------------------------------------------------|----------------------------------------------------------------------------------------------------------------------------------|

## 1. General

### 1.1 Cook book of the manufacturer

SOLAAR Cookbook
— □ ×

← →  
Einblenden Optionen

## Silicon Si

|                         |              |               |               |
|-------------------------|--------------|---------------|---------------|
| Atomic no.              | <b>14</b>    | Atomic mass   | <b>28.086</b> |
| Primary wavelength (nm) | <b>251.6</b> | Bandpass (nm) | <b>0.5</b>    |

|                  |             |                                           |            |
|------------------|-------------|-------------------------------------------|------------|
| Lamp Current     |             | Performance                               |            |
| normal use       | <b>75%</b>  | flame characteristic concentration (mg/l) | <b>1.3</b> |
| best sensitivity | <b>75%</b>  | furnace characteristic mass (pg)          | <b>21</b>  |
| best precision   | <b>100%</b> |                                           |            |

|                            |              |                       |  |
|----------------------------|--------------|-----------------------|--|
| Emission wavelength (nm)   | <b>251.6</b> |                       |  |
| Secondary wavelengths (nm) |              | Sensitivity reduction |  |
|                            | <b>250.7</b> | <b>2.6 X</b>          |  |
|                            | <b>251.4</b> | <b>3.4 X</b>          |  |
|                            | <b>252.9</b> | <b>3.4 X</b>          |  |
|                            | <b>252.4</b> | <b>3.8 X</b>          |  |
|                            | <b>221.7</b> | <b>4.5 X</b>          |  |
|                            | <b>221.1</b> | <b>10 X</b>           |  |

**Flame** ([show](#)/[hide details](#))

**Furnace** ([show](#)/[hide details](#))

|                     |                      |          |                                           |
|---------------------|----------------------|----------|-------------------------------------------|
| Cuvette type        | <b>Coated or ELC</b> | Modifier | <b>none recommended</b>                   |
| Ash temperature     | <b>1300°C</b>        | Signal   | <b>20 µl of 25 µg/l gives about 0.1 A</b> |
| Atomise temperature | <b>2600°C</b>        |          |                                           |

1. Background absorption and scatter are common
  - use background correction.
2. Silicon has a high risk of contamination
  - take particular care when preparing solutions.
  - use plastic vessels, and avoid the use of glassware.

Figure 1: Original screenshot from the manufacturer's cookbook with respect to ideal Si conditions. Note the indication for the Modifier as "none recommended". Screenshot taken from SOLAAR AA Software cook book, software version: 11,10, spectrometer software version: 1.30, ©1996-2010 by Thermo Fisher Scientific Inc.

Supplementary Information

Raw data of

Ultra-trace elemental determination of Si by means of graphite furnace-atomic absorption spectrometry

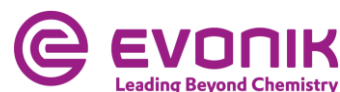

### 1.2 Preparation of the stock solution

A silane solution containing 25242 µg/g silane, equating to 5.4 mass% SiO<sub>2</sub>, was diluted to a solution containing 48.6 µg/L Si (ethanol) and 51.8 µg/L (acetic acid), respectively.

### 1.3 Optimisation of the graphite furnace temperatures

Table 1: Optimisation of the ashing and atomisation temperatures in ethanol using a matrix-matched standard. Bold horizontal line indicates change between constant parameters, bold values equate the highest signals found for the given varied parameter. Ideal values were 1000°C and 2700°C for ashing and atomisation temperatures, respectively.

| Ashing temperature / °C | Atomisation temperature / °C | Signal height | Signal area  |
|-------------------------|------------------------------|---------------|--------------|
| 800                     | 2700                         | 0.305         | 0.148        |
| 900                     | 2700                         | 0.298         | 0.147        |
| <b>1000</b>             | <b>2700</b>                  | <b>0.309</b>  | <b>0.152</b> |
| 1100                    | 2700                         | 0.276         | 0.137        |
| 1200                    | 2700                         | 0.236         | 0.117        |
| 1300                    | 2700                         | 0.154         | 0.076        |
| 1000                    | 1700                         | 0.002         | 0.001        |
| 1000                    | 1800                         | 0.002         | 0.001        |
| 1000                    | 1900                         | 0.004         | 0.002        |
| 1000                    | 2000                         | 0.008         | 0.004        |
| 1000                    | 2100                         | 0.021         | 0.012        |
| 1000                    | 2200                         | 0.047         | 0.027        |
| 1000                    | 2300                         | 0.083         | 0.051        |
| 1000                    | 2400                         | 0.110         | 0.090        |
| 1000                    | 2500                         | 0.166         | 0.137        |
| 1000                    | 2600                         | 0.245         | 0.161        |
| 1000                    | 2700                         | 0.298         | 0.153        |
| <b>1000</b>             | <b>2700</b>                  | <b>0.329</b>  | <b>0.166</b> |
| 1000                    | 2800                         | 0.322         | 0.140        |
| 1000                    | 2900                         | 0.242         | 0.105        |

Table 2: Optimisation of the ashing and atomization temperatures in acetic acid using a matrix-matched standard. Bold horizontal line indicates change between constant parameters, bold values equate the highest signals found for the given varied parameter. Ideal values were 1150°C and 2650°C for ashing and atomisation temperatures, respectively.

| Ashing temperature / °C | Atomisation temperature / °C | Signal height | Signal area  |
|-------------------------|------------------------------|---------------|--------------|
| 800                     | 2700                         | 0.110         | 0.053        |
| 900                     | 2700                         | 0.153         | 0.074        |
| 1100                    | 2700                         | 0.129         | 0.066        |
| <b>1150</b>             | <b>2700</b>                  | <b>0.137</b>  | <b>0.068</b> |

## Supplementary Information

Raw data of  
Ultra-trace elemental determination of Si by means of graphite  
furnace-atomic absorption spectrometry



| Ashing temperature / °C | Atomisation temperature / °C | Signal height | Signal area  |
|-------------------------|------------------------------|---------------|--------------|
| 1200                    | 2700                         | 0.127         | 0.064        |
| 1250                    | 2700                         | 0.106         | 0.050        |
| 1150                    | 2600                         | 0.117         | 0.074        |
| <b>1150</b>             | <b>2650</b>                  | <b>0.138</b>  | <b>0.077</b> |
| 1150                    | 2700                         | 0.127         | 0.064        |
| 1150                    | 2750                         | 0.132         | 0.062        |
| 1150                    | 2800                         | 0.131         | 0.058        |
| 1150                    | 2850                         | 0.100         | 0.043        |

## 2. Si in food contact acetic acid

### 2.1 Calibration & Linearity

Table 3: Calibration data. Slope  $m = 0.00376$  L/ $\mu\text{g}$ , intercept  $b = 0.0028$ , coefficient of correlation  $r = 0.9970$ , characteristic concentration  $\beta_{\text{char.}}(\text{Si}) = 1.1688$   $\mu\text{g/L}$ .

| Solution   | Concentration / $\mu\text{g/L}$ | Extinction at 251.6 nm (Si) |
|------------|---------------------------------|-----------------------------|
| Blank      | 0.00                            | 0.0046                      |
| Standard 1 | 2.0718                          | 0.0127                      |
| Standard 2 | 4.9206                          | 0.0210                      |
| Standard 3 | 6.9925                          | 0.0277                      |
| Standard 4 | 10.1003                         | 0.0397                      |
| Standard 5 | 15.0209                         | 0.0561                      |
| Standard 6 | 19.9415                         | 0.0757                      |
| Standard 7 | 25.1212                         | 0.1018                      |

### 2.2 Accuracy & Precision

Table 4: Raw data from the Accuracy and Precision experiments.

| Name            | Signal height | Signal area | RSD / % | Conc. / $\mu\text{g/L}$ | Corrected Conc. / $\mu\text{g/L}$ |
|-----------------|---------------|-------------|---------|-------------------------|-----------------------------------|
| Blank Avg.      | 0.005         | 0.002       | 23.2    |                         |                                   |
| Blank 1/3       | 0.004         | 0.001       |         |                         |                                   |
| Blank 2/3       | 0.004         | 0.002       |         |                         |                                   |
| Blank 3/3       | 0.006         | 0.003       |         |                         |                                   |
| Standard 1 Avg. | 0.014         | 0.007       | 9.8     | 2.0718                  |                                   |
| Standard 1 1/3  | 0.013         | 0.007       |         |                         |                                   |
| Standard 1 2/3  | 0.012         | 0.006       |         |                         |                                   |
| Standard 1 3/3  | 0.013         | 0.007       |         |                         |                                   |
| Standard 2 Avg. | 0.021         | 0.011       | 7.6     | 4.9206                  |                                   |
| Standard 2 1/3  | 0.021         | 0.011       |         |                         |                                   |

**Supplementary Information**

Raw data of

**Ultra-trace elemental determination of Si by means of graphite furnace-atomic absorption spectrometry**



| Name            | Signal height | Signal area | RSD / % | Conc. / µg/L | Corrected Conc. / µg/L |
|-----------------|---------------|-------------|---------|--------------|------------------------|
| Standard 2 2/3  | 0.023         | 0.011       |         |              |                        |
| Standard 2 3/3  | 0.019         | 0.012       |         |              |                        |
| Standard 3 Avg. | 0.029         | 0.016       | 6.9     | 6.9925       |                        |
| Standard 3 1/3  | 0.028         | 0.015       |         |              |                        |
| Standard 3 2/3  | 0.028         | 0.015       |         |              |                        |
| Standard 3 3/3  | 0.026         | 0.013       |         |              |                        |
| Standard 4 Avg. | 0.040         | 0.021       | 2.4     | 10.1003      |                        |
| Standard 4 1/3  | 0.040         | 0.021       |         |              |                        |
| Standard 4 2/3  | 0.039         | 0.021       |         |              |                        |
| Standard 4 3/3  | 0.040         | 0.022       |         |              |                        |
| Standard 5 Avg. | 0.057         | 0.030       | 3.4     | 15.0209      |                        |
| Standard 5 1/3  | 0.056         | 0.029       |         |              |                        |
| Standard 5 2/3  | 0.054         | 0.027       |         |              |                        |
| Standard 5 3/3  | 0.057         | 0.031       |         |              |                        |
| Standard 6 Avg. | 0.074         | 0.038       | 2.9     | 19.9415      |                        |
| Standard 6 1/3  | 0.076         | 0.039       |         |              |                        |
| Standard 6 2/3  | 0.078         | 0.041       |         |              |                        |
| Standard 6 3/3  | 0.075         | 0.039       |         |              |                        |
| Standard 7 Avg. | 0.105         | 0.056       | 3.3     | 25.1212      |                        |
| Standard 7 1/3  | 0.102         | 0.055       |         |              |                        |
| Standard 7 2/3  | 0.098         | 0.052       |         |              |                        |
| Standard 7 3/3  | 0.103         | 0.056       |         |              |                        |
| QC 1 µg/L Avg.  | 0.031         | 0.016       | 6.4     | 7.5427       | 1.5085                 |
| QC 1 µg/L 1/3   | 0.033         | 0.017       |         |              |                        |
| QC 1 µg/L 2/3   | 0.029         | 0.016       |         |              |                        |
| QC 1 µg/L 3/3   | 0.032         | 0.016       |         |              |                        |
| Sample Avg.     | 0.017         | 0.009       | 31.3    | 3.7442       | 0.7488                 |
| Sample 1/3      | 0.014         | 0.007       |         |              |                        |
| Sample 2/3      | 0.014         | 0.007       |         |              |                        |
| Sample 3/3      | 0.023         | 0.011       |         |              |                        |
| Sample Avg.     | 0.014         | 0.008       | 2.4     | 3.0934       | 0.6187                 |
| Sample 1/3      | 0.040         | 0.019       |         |              |                        |
| Sample 2/3      | 0.014         | 0.008       |         |              |                        |
| Sample 3/3      | 0.015         | 0.008       |         |              |                        |
| Sample Avg.     | 0.015         | 0.008       | 12.9    | 3.1952       | 0.6390                 |
| Sample 1/3      | 0.014         | 0.007       |         |              |                        |

**Supplementary Information**

Raw data of

**Ultra-trace elemental determination of Si by means of graphite furnace-atomic absorption spectrometry**



| Name                 | Signal height | Signal area | RSD / % | Conc. / µg/L | Corrected Conc. / µg/L |
|----------------------|---------------|-------------|---------|--------------|------------------------|
| Sample 2/3           | 0.017         | 0.008       |         |              |                        |
| Sample 3/3           | 0.013         | 0.007       |         |              |                        |
| QC 1 µg/L Avg.       | 0.032         | 0.017       | 0.4     | 7.8084       | 1.5617                 |
| QC 1 µg/L 1/3        | 0.225         | 0.092       |         |              |                        |
| QC 1 µg/L 2/3        | 0.032         | 0.017       |         |              |                        |
| QC 1 µg/L 3/3        | 0.032         | 0.017       |         |              |                        |
| Sample + 1 µg/L Avg. | 0.033         | 0.017       | 5.2     | 8.0828       | 1.6166                 |
| Sample + 1 µg/L 1/3  | 0.031         | 0.016       |         |              |                        |
| Sample + 1 µg/L 2/3  | 0.034         | 0.017       |         |              |                        |
| Sample + 1 µg/L 3/3  | 0.035         | 0.018       |         |              |                        |
| Sample + 1 µg/L Avg. | 0.036         | 0.019       | 8.9     | 8.7469       | 1.7494                 |
| Sample + 1 µg/L 1/3  | 0.034         | 0.017       |         |              |                        |
| Sample + 1 µg/L 2/3  | 0.034         | 0.018       |         |              |                        |
| Sample + 1 µg/L 3/3  | 0.039         | 0.020       |         |              |                        |
| Sample + 1 µg/L Avg. | 0.034         | 0.017       | 2.9     | 8.2511       | 1.6502                 |
| Sample + 1 µg/L 1/3  | 0.034         | 0.018       |         |              |                        |
| Sample + 1 µg/L 2/3  | 0.033         | 0.016       |         |              |                        |
| Sample + 1 µg/L 3/3  | 0.035         | 0.018       |         |              |                        |
| QC 1 µg/L Avg.       | 0.036         | 0.019       | 1.5     | 8.7381       | 1.7476                 |
| QC 1 µg/L 1/3        | 0.036         | 0.018       |         |              |                        |
| QC 1 µg/L 2/3        | 0.035         | 0.019       |         |              |                        |
| QC 1 µg/L 3/3        | 0.036         | 0.019       |         |              |                        |
| Sample + 2 µg/L Avg. | 0.055         | 0.028       | 2.6     | 13.9178      | 2.7836                 |
| Sample + 2 µg/L 1/3  | 0.057         | 0.030       |         |              |                        |
| Sample + 2 µg/L 2/3  | 0.055         | 0.028       |         |              |                        |
| Sample + 2 µg/L 3/3  | 0.054         | 0.027       |         |              |                        |
| Sample + 2 µg/L Avg. | 0.054         | 0.027       | 0.4     | 13.6876      | 2.7375                 |
| Sample + 2 µg/L 1/3  | 0.054         | 0.027       |         |              |                        |
| Sample + 2 µg/L 2/3  | 0.054         | 0.027       |         |              |                        |

**Supplementary Information**

Raw data of

**Ultra-trace elemental determination of Si by means of graphite furnace-atomic absorption spectrometry**



| Name                 | Signal height | Signal area | RSD / % | Conc. / µg/L | Corrected Conc. / µg/L |
|----------------------|---------------|-------------|---------|--------------|------------------------|
| Sample + 2 µg/L 3/3  | 0.055         | 0.027       |         |              |                        |
| Sample + 2 µg/L Avg. | 0.060         | 0.030       | 4.0     | 15.2283      | 3.0457                 |
| Sample + 2 µg/L 1/3  | 0.063         | 0.032       |         |              |                        |
| Sample + 2 µg/L 2/3  | 0.059         | 0.029       |         |              |                        |
| Sample + 2 µg/L 3/3  | 0.058         | 0.029       |         |              |                        |
| QC 1 µg/L Avg.       | 0.034         | 0.017       | 1.8     | 8.4193       | 1.6839                 |
| QC 1 µg/L 1/3        | 0.035         | 0.018       |         |              |                        |
| QC 1 µg/L 2/3        | 0.034         | 0.017       |         |              |                        |
| QC 1 µg/L 3/3        | 0.034         | 0.017       |         |              |                        |
| Sample + 3 µg/L Avg. | 0.077         | 0.039       | 0.9     | 19.7263      | 3.9453                 |
| Sample + 3 µg/L 1/3  | 0.076         | 0.039       |         |              |                        |
| Sample + 3 µg/L 2/3  | 0.078         | 0.039       |         |              |                        |
| Sample + 3 µg/L 3/3  | 0.077         | 0.038       |         |              |                        |
| Sample + 3 µg/L Avg. | 0.082         | 0.041       | 1.8     | 20.9570      | 4.1914                 |
| Sample + 3 µg/L 1/3  | 0.083         | 0.041       |         |              |                        |
| Sample + 3 µg/L 2/3  | 0.082         | 0.041       |         |              |                        |
| Sample + 3 µg/L 3/3  | 0.080         | 0.040       |         |              |                        |
| Sample + 3 µg/L Avg. | 0.075         | 0.038       | 1.7     | 19.3013      | 3.8603                 |
| Sample + 3 µg/L 1/3  | 0.077         | 0.040       |         |              |                        |
| Sample + 3 µg/L 2/3  | 0.075         | 0.038       |         |              |                        |
| Sample + 3 µg/L 3/3  | 0.075         | 0.037       |         |              |                        |
| QC 1 µg/L Avg.       | 0.036         | 0.018       | 3.4     | 8.7204       | 1.7441                 |
| QC 1 µg/L 1/3        | 0.037         | 0.018       |         |              |                        |
| QC 1 µg/L 2/3        | 0.036         | 0.018       |         |              |                        |
| QC 1 µg/L 3/3        | 0.034         | 0.018       |         |              |                        |

|                                                                                                                                                                 |                                                                                                                                  |
|-----------------------------------------------------------------------------------------------------------------------------------------------------------------|----------------------------------------------------------------------------------------------------------------------------------|
| <b>Supplementary Information</b><br>Raw data of<br><b>Ultra-trace elemental determination of Si by means of graphite furnace-atomic absorption spectrometry</b> | <br><b>EVONIK</b><br>Leading Beyond Chemistry |
|-----------------------------------------------------------------------------------------------------------------------------------------------------------------|----------------------------------------------------------------------------------------------------------------------------------|

Table 5: Calculations for the Accuracy & Precision experiments.

| Name                 | Accuracy          | Precision |        |         |
|----------------------|-------------------|-----------|--------|---------|
|                      | Recovery Rate / % | Avg. / %  | SD / % | RSD / % |
| Sample + 1 µg/L Avg. | 91                | 97        | 7      | 7       |
| Sample + 1 µg/L Avg. | 104               |           |        |         |
| Sample + 1 µg/L Avg. | 95                |           |        |         |
| Sample + 2 µg/L Avg. | 102               | 106       | 8      | 8       |
| Sample + 2 µg/L Avg. | 100               |           |        |         |
| Sample + 2 µg/L Avg. | 115               |           |        |         |
| Sample + 3 µg/L Avg. | 105               | 107       | 6      | 5       |
| Sample + 3 µg/L Avg. | 113               |           |        |         |
| Sample + 3 µg/L Avg. | 103               |           |        |         |

### 2.3 Limit of detection, limit of quantitation

Table 6: Raw data & calculations for the determinations of the LOD and LOQ, respectively, by means of the blank method. Values below the bold line refer to calculations.

| Name                                | Value  |
|-------------------------------------|--------|
| Blank 1                             | 0.0039 |
| Blank 2                             | 0.0048 |
| Blank 3                             | 0.0050 |
| Blank 4                             | 0.0048 |
| Blank 5                             | 0.0041 |
| Blank 6                             | 0.0035 |
| Blank 7                             | 0.0028 |
| Blank 8                             | 0.0038 |
| Blank 9                             | 0.0034 |
| Blank 10                            | 0.0044 |
| Mean                                | 0.0041 |
| Standard deviation                  | 0.0007 |
| Concentrating factor                | 5      |
| LOD / µg/L                          | 0.565  |
| LOQ / µg/L                          | 1.883  |
| LOD WRT concentrating factor / µg/L | 0.113  |
| LOQ WRT concentrating factor / µg/L | 0.377  |

**Supplementary Information**

Raw data of

**Ultra-trace elemental determination of Si by means of graphite furnace-atomic absorption spectrometry**



**2.4 Stability of solution**

Table 7: Raw data for the Stability of Solution.

| Name            | Signal height | Signal area | RSD / % | Conc. / µg/L | Corrected Conc. / µg/L |
|-----------------|---------------|-------------|---------|--------------|------------------------|
| Blank Avg.      | 0.004         | 0.002       | 5.7     | 0.000        |                        |
| Blank 1/3       | 0.004         | 0.002       |         |              |                        |
| Blank 2/3       | 0.003         | 0.002       |         |              |                        |
| Blank 3/3       | 0.004         | 0.002       |         |              |                        |
| Standard 1 Avg. | 0.016         | 0.008       | 2.2     | 2.056        |                        |
| Standard 1 1/3  | 0.016         | 0.008       |         |              |                        |
| Standard 1 2/3  | 0.017         | 0.008       |         |              |                        |
| Standard 1 3/3  | 0.016         | 0.009       |         |              |                        |
| Standard 2 Avg. | 0.029         | 0.015       | 7.7     | 4.882        |                        |
| Standard 2 1/3  | 0.027         | 0.014       |         |              |                        |
| Standard 2 2/3  | 0.031         | 0.016       |         |              |                        |
| Standard 2 3/3  | 0.028         | 0.015       |         |              |                        |
| Standard 3 Avg. | 0.035         | 0.019       | 7.4     | 6.938        |                        |
| Standard 3 1/3  | 0.033         | 0.018       |         |              |                        |
| Standard 3 2/3  | 0.036         | 0.020       |         |              |                        |
| Standard 3 3/3  | 0.064         | 0.033       |         |              |                        |
| Standard 4 Avg. | 0.048         | 0.025       | 12.7    | 10.021       |                        |
| Standard 4 1/3  | 0.055         | 0.028       |         |              |                        |
| Standard 4 2/3  | 0.045         | 0.024       |         |              |                        |
| Standard 4 3/3  | 0.045         | 0.024       |         |              |                        |
| Standard 5 Avg. | 0.061         | 0.033       | 4.5     | 14.904       |                        |
| Standard 5 1/3  | 0.065         | 0.035       |         |              |                        |
| Standard 5 2/3  | 0.060         | 0.032       |         |              |                        |
| Standard 5 3/3  | 0.060         | 0.031       |         |              |                        |
| Standard 6 Avg. | 0.079         | 0.042       | 2.0     | 20.043       |                        |
| Standard 6 1/3  | 0.077         | 0.042       |         |              |                        |
| Standard 6 2/3  | 0.080         | 0.043       |         |              |                        |
| Standard 6 3/3  | 0.079         | 0.042       |         |              |                        |
| Standard 7 Avg. | 0.099         | 0.054       | 1.2     | 25.182       |                        |
| Standard 7 1/3  | 0.101         | 0.055       |         |              |                        |
| Standard 7 2/3  | 0.099         | 0.054       |         |              |                        |
| Standard 7 3/3  | 0.098         | 0.053       |         |              |                        |
| QC 1 µg/L Avg.  | 0.039         | 0.021       | 0.4     | 8.465        | 1.693                  |



**Supplementary Information**

Raw data of

**Ultra-trace elemental determination of Si by means of graphite furnace-atomic absorption spectrometry**



| Name                 | Signal height | Signal area | RSD / % | Conc. / µg/L | Corrected Conc. / µg/L |
|----------------------|---------------|-------------|---------|--------------|------------------------|
| QC 1 µg/L 1/3        | 0.039         | 0.022       |         |              |                        |
| QC 1 µg/L 2/3        | 0.039         | 0.021       |         |              |                        |
| QC 1 µg/L 3/3        | 0.039         | 0.021       |         |              |                        |
| Sample Avg.          | 0.025         | 0.013       | 14.7    | 4.595        | 0.919                  |
| Sample 1/3           | 0.028         | 0.015       |         |              |                        |
| Sample 2/3           | 0.034         | 0.018       |         |              |                        |
| Sample 3/3           | 0.022         | 0.012       |         |              |                        |
| Sample Avg.          | 0.021         | 0.011       | 21.4    | 3.480        | 0.696                  |
| Sample 1/3           | 0.020         | 0.011       |         |              |                        |
| Sample 2/3           | 0.017         | 0.008       |         |              |                        |
| Sample 3/3           | 0.026         | 0.014       |         |              |                        |
| Sample Avg.          | 0.019         | 0.010       | 21.3    | 2.807        | 0.561                  |
| Sample 1/3           | 0.021         | 0.011       |         |              |                        |
| Sample 2/3           | 0.014         | 0.007       |         |              |                        |
| Sample 3/3           | 0.020         | 0.011       |         |              |                        |
| QC 1 µg/L Avg.       | 0.033         | 0.018       | 2.1     | 6.880        | 1.376                  |
| QC 1 µg/L 1/3        | 0.034         | 0.018       |         |              |                        |
| QC 1 µg/L 2/3        | 0.033         | 0.017       |         |              |                        |
| QC 1 µg/L 3/3        | 0.032         | 0.018       |         |              |                        |
| Sample + 2 µg/L Avg. | 0.049         | 0.026       | 2.6     | 11.128       | 2.226                  |
| Sample + 2 µg/L 1/3  | 0.050         | 0.026       |         |              |                        |
| Sample + 2 µg/L 2/3  | 0.048         | 0.026       |         |              |                        |
| Sample + 2 µg/L 3/3  | 0.047         | 0.026       |         |              |                        |
| Sample + 2 µg/L Avg. | 0.049         | 0.026       | 9.3     | 11.275       | 2.255                  |
| Sample + 2 µg/L 1/3  | 0.046         | 0.023       |         |              |                        |
| Sample + 2 µg/L 2/3  | 0.048         | 0.025       |         |              |                        |
| Sample + 2 µg/L 3/3  | 0.054         | 0.028       |         |              |                        |
| Sample + 2 µg/L Avg. | 0.050         | 0.026       | 1.8     | 11.533       | 2.307                  |
| Sample + 2 µg/L 1/3  | 0.051         | 0.027       |         |              |                        |
| Sample + 2 µg/L 2/3  | 0.049         | 0.025       |         |              |                        |
| Sample + 2 µg/L 3/3  | 0.050         | 0.026       |         |              |                        |
| QC 1 µg/L Avg.       | 0.036         | 0.019       | 2.1     | 7.700        | 1.540                  |

|                                                                                                                                                                 |                                                                                                                                  |
|-----------------------------------------------------------------------------------------------------------------------------------------------------------------|----------------------------------------------------------------------------------------------------------------------------------|
| <b>Supplementary Information</b><br>Raw data of<br><b>Ultra-trace elemental determination of Si by means of graphite furnace-atomic absorption spectrometry</b> | <br><b>EVONIK</b><br>Leading Beyond Chemistry |
|-----------------------------------------------------------------------------------------------------------------------------------------------------------------|----------------------------------------------------------------------------------------------------------------------------------|

| Name          | Signal height | Signal area | RSD / % | Conc. / µg/L | Corrected Conc. / µg/L |
|---------------|---------------|-------------|---------|--------------|------------------------|
| QC 1 µg/L 1/3 | 0.036         | 0.019       |         |              |                        |
| QC 1 µg/L 2/3 | 0.036         | 0.018       |         |              |                        |
| QC 1 µg/L 3/3 | 0.037         | 0.020       |         |              |                        |

Table 8: Calculations for the Stability of Solution.

| Name                 | Accuracy          | Precision |        |         |
|----------------------|-------------------|-----------|--------|---------|
|                      | Recovery Rate / % | Avg. / %  | SD / % | RSD / % |
| Sample + 2 µg/L Avg. | 72                | 74        | 2      | 3       |
| Sample + 2 µg/L Avg. | 74                |           |        |         |
| Sample + 2 µg/L Avg. | 76                |           |        |         |

### 3. Si in food contact ethanol

#### 3.1 Calibration & Linearity

Table 9: Calibration data. Slope  $m = 0.00551$  L/µg, intercept  $b = 0.0056$ , coefficient of correlation  $r = 0.9986$ , characteristic concentration  $\beta_{\text{char.}}(\text{Si}) = 0.7991$  µg/L. Data below the bold line were used for the Accuracy & Precision experiments starting from the 2 µg/L standard addition. Here, slope  $m = 0.00546$  L/µg, intercept  $b = 0.0073$ , coefficient of correlation  $r = 0.9999$ , characteristic concentration  $\beta_{\text{char.}}(\text{Si}) = 0.8066$  µg/L.

| Solution   | Concentration / µg/L | Extinction at 251.6 nm (Si) |
|------------|----------------------|-----------------------------|
| Blank      | 0                    | 0.003                       |
| Standard 1 | 1.9425               | 0.016                       |
| Standard 2 | 5.0989               | 0.035                       |
| Standard 3 | 7.0414               | 0.044                       |
| Standard 4 | 9.9551               | 0.061                       |
| Standard 5 | 15.0540              | 0.092                       |
| Standard 6 | 19.9101              | 0.118                       |
| Standard 7 | 25.0091              | 0.139                       |
| Blank      | 0                    | 0.006                       |
| Standard 1 | 1.9425               | 0.018                       |
| Standard 2 | 5.0989               | 0.036                       |
| Standard 3 | 7.0414               | 0.046                       |
| Standard 4 | 9.9551               | 0.061                       |
| Standard 5 | 15.0540              | 0.090                       |
| Standard 6 | 19.9101              | 0.116                       |
| Standard 7 | 25.0091              | 0.143                       |

Supplementary Information

Raw data of  
Ultra-trace elemental determination of Si by means of graphite  
furnace-atomic absorption spectrometry



3.2 Accuracy & Precision

Table 10: Raw data from the Accuracy and Precision experiments. Data below the bold line correspond to analyses made on a later day.

| Name            | Signal height | Signal area | RSD / % | Conc. / µg/L | Corrected Conc. / µg/L |
|-----------------|---------------|-------------|---------|--------------|------------------------|
| Blank Avg.      | 0.003         | 0.001       | 45.0    | 0            |                        |
| Blank 1/3       | 0.004         | 0.001       |         |              |                        |
| Blank 2/3       | 0.002         | 0.000       |         |              |                        |
| Blank 3/3       | 0.002         | 0.001       |         |              |                        |
| Standard 1 Avg. | 0.016         | 0.009       | 9.0     | 1.9425       |                        |
| Standard 1 1/3  | 0.017         | 0.010       |         |              |                        |
| Standard 1 2/3  | 0.021         | 0.010       |         |              |                        |
| Standard 1 3/3  | 0.015         | 0.007       |         |              |                        |
| Standard 2 Avg. | 0.035         | 0.019       | 7.8     | 5.0989       |                        |
| Standard 2 1/3  | 0.045         | 0.022       |         |              |                        |
| Standard 2 2/3  | 0.037         | 0.019       |         |              |                        |
| Standard 2 3/3  | 0.034         | 0.018       |         |              |                        |
| Standard 3 Avg. | 0.044         | 0.023       | 1.2     | 7.0414       |                        |
| Standard 3 1/3  | 0.045         | 0.023       |         |              |                        |
| Standard 3 2/3  | 0.044         | 0.023       |         |              |                        |
| Standard 3 3/3  | 0.044         | 0.023       |         |              |                        |
| Standard 4 Avg. | 0.061         | 0.031       | 1.2     | 9.9551       |                        |
| Standard 4 1/3  | 0.060         | 0.031       |         |              |                        |
| Standard 4 2/3  | 0.061         | 0.031       |         |              |                        |
| Standard 4 3/3  | 0.062         | 0.032       |         |              |                        |
| Standard 5 Avg. | 0.092         | 0.047       | 1.1     | 15.0540      |                        |
| Standard 5 1/3  | 0.091         | 0.047       |         |              |                        |
| Standard 5 2/3  | 0.091         | 0.047       |         |              |                        |
| Standard 5 3/3  | 0.093         | 0.048       |         |              |                        |
| Standard 6 Avg. | 0.118         | 0.062       | 3.0     | 19.9101      |                        |
| Standard 6 1/3  | 0.120         | 0.062       |         |              |                        |
| Standard 6 2/3  | 0.120         | 0.062       |         |              |                        |
| Standard 6 3/3  | 0.114         | 0.061       |         |              |                        |
| Standard 7 Avg. | 0.139         | 0.074       | 0.8     | 25.0091      |                        |
| Standard 7 1/3  | 0.139         | 0.073       |         |              |                        |
| Standard 7 2/3  | 0.140         | 0.074       |         |              |                        |
| Standard 7 3/3  | 0.138         | 0.073       |         |              |                        |
| QC 1 µg/L Avg.  | 0.039         | 0.020       | 1.7     | 6.0846       | 1.2169                 |

**Supplementary Information**

Raw data of

**Ultra-trace elemental determination of Si by means of graphite furnace-atomic absorption spectrometry**

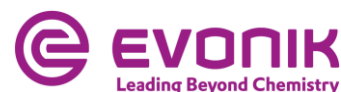

| Name                 | Signal height | Signal area | RSD / % | Conc. / µg/L | Corrected Conc. / µg/L |
|----------------------|---------------|-------------|---------|--------------|------------------------|
| QC 1 µg/L 1/3        | 0.038         | 0.020       |         |              |                        |
| QC 1 µg/L 2/3        | 0.039         | 0.020       |         |              |                        |
| QC 1 µg/L 3/3        | 0.040         | 0.020       |         |              |                        |
| Sample Avg.          | 0.009         | 0.004       | 6.1     | 0.6480       | 0.1296                 |
| Sample 1/3           | 0.051         | 0.020       |         |              |                        |
| Sample 2/3           | 0.009         | 0.003       |         |              |                        |
| Sample 3/3           | 0.010         | 0.004       |         |              |                        |
| Sample Avg.          | 0.010         | 0.004       | 12.5    | 0.8418       | 0.1684                 |
| Sample 1/3           | 0.009         | 0.004       |         |              |                        |
| Sample 2/3           | 0.011         | 0.005       |         |              |                        |
| Sample 3/3           | 0.011         | 0.005       |         |              |                        |
| Sample Avg.          | 0.011         | 0.005       | 14.6    | 0.9992       | 0.1998                 |
| Sample 1/3           | 0.013         | 0.007       |         |              |                        |
| Sample 2/3           | 0.010         | 0.004       |         |              |                        |
| Sample 3/3           | 0.010         | 0.004       |         |              |                        |
| QC 1 µg/L Avg.       | 0.047         | 0.024       | 7.7     | 7.4528       | 1.4906                 |
| QC 1 µg/L 1/3        | 0.049         | 0.025       |         |              |                        |
| QC 1 µg/L 2/3        | 0.043         | 0.022       |         |              |                        |
| QC 1 µg/L 3/3        | 0.049         | 0.024       |         |              |                        |
| Sample + 1 µg/L Avg. | 0.033         | 0.016       | 16.4    | 4.9827       | 0.9965                 |
| Sample + 1 µg/L 1/3  | 0.029         | 0.015       |         |              |                        |
| Sample + 1 µg/L 2/3  | 0.031         | 0.016       |         |              |                        |
| Sample + 1 µg/L 3/3  | 0.039         | 0.018       |         |              |                        |
| Sample + 1 µg/L Avg. | 0.031         | 0.015       | 1.9     | 4.6740       | 0.9348                 |
| Sample + 1 µg/L 1/3  | 0.032         | 0.015       |         |              |                        |
| Sample + 1 µg/L 2/3  | 0.031         | 0.014       |         |              |                        |
| Sample + 1 µg/L 3/3  | 0.032         | 0.016       |         |              |                        |
| Sample + 1 µg/L Avg. | 0.029         | 0.015       | 1.7     | 4.3047       | 0.8609                 |
| Sample + 1 µg/L 1/3  | 0.029         | 0.015       |         |              |                        |
| Sample + 1 µg/L 2/3  | 0.029         | 0.016       |         |              |                        |
| Sample + 1 µg/L 3/3  | 0.030         | 0.015       |         |              |                        |
| QC 1 µg/L Avg.       | 0.050         | 0.025       | 4.1     | 8.0461       | 1.6092                 |
| QC 1 µg/L 1/3        | 0.051         | 0.025       |         |              |                        |
| QC 1 µg/L 2/3        | 0.048         | 0.025       |         |              |                        |
| QC 1 µg/L 3/3        | 0.051         | 0.026       |         |              |                        |
| Blank Avg.           | 0.006         | 0.004       | 42.5    | 0            |                        |

**Supplementary Information**

Raw data of

**Ultra-trace elemental determination of Si by means of graphite  
furnace-atomic absorption spectrometry**



| Name                 | Signal height | Signal area | RSD / % | Conc. / µg/L | Corrected Conc. / µg/L |
|----------------------|---------------|-------------|---------|--------------|------------------------|
| Blank 1/3            | 0.007         | 0.003       |         |              |                        |
| Blank 2/3            | 0.004         | 0.002       |         |              |                        |
| Blank 3/3            | 0.009         | 0.005       |         |              |                        |
| Standard 1 Avg.      | 0.018         | 0.009       | 17.8    | 1.9425       |                        |
| Standard 1 1/3       | 0.021         | 0.011       |         |              |                        |
| Standard 1 2/3       | 0.015         | 0.008       |         |              |                        |
| Standard 1 3/3       | 0.017         | 0.009       |         |              |                        |
| Standard 2 Avg.      | 0.036         | 0.019       | 3.6     | 5.0989       |                        |
| Standard 2 1/3       | 0.034         | 0.020       |         |              |                        |
| Standard 2 2/3       | 0.036         | 0.018       |         |              |                        |
| Standard 2 3/3       | 0.036         | 0.020       |         |              |                        |
| Standard 3 Avg.      | 0.046         | 0.025       | 3.1     | 7.0414       |                        |
| Standard 3 1/3       | 0.046         | 0.025       |         |              |                        |
| Standard 3 2/3       | 0.048         | 0.026       |         |              |                        |
| Standard 3 3/3       | 0.045         | 0.025       |         |              |                        |
| Standard 4 Avg.      | 0.061         | 0.033       | 1.4     | 9.9551       |                        |
| Standard 4 1/3       | 0.062         | 0.033       |         |              |                        |
| Standard 4 2/3       | 0.060         | 0.033       |         |              |                        |
| Standard 4 3/3       | 0.062         | 0.034       |         |              |                        |
| Standard 5 Avg.      | 0.090         | 0.049       | 1.4     | 15.0540      |                        |
| Standard 5 1/3       | 0.092         | 0.050       |         |              |                        |
| Standard 5 2/3       | 0.089         | 0.049       |         |              |                        |
| Standard 5 3/3       | 0.090         | 0.049       |         |              |                        |
| Standard 6 Avg.      | 0.116         | 0.064       | 0.7     | 19.9101      |                        |
| Standard 6 1/3       | 0.116         | 0.064       |         |              |                        |
| Standard 6 2/3       | 0.117         | 0.064       |         |              |                        |
| Standard 6 3/3       | 0.117         | 0.064       |         |              |                        |
| Standard 7 Avg.      | 0.143         | 0.079       | 2.0     | 25.0091      |                        |
| Standard 7 1/3       | 0.146         | 0.080       |         |              |                        |
| Standard 7 2/3       | 0.140         | 0.078       |         |              |                        |
| Standard 7 3/3       | 0.142         | 0.078       |         |              |                        |
| QC 1 µg/L Avg.       | 0.042         | 0.023       | 8.7     | 6.4136       | 1.2827                 |
| QC 1 µg/L 1/3        | 0.043         | 0.023       |         |              |                        |
| QC 1 µg/L 2/3        | 0.046         | 0.024       |         |              |                        |
| QC 1 µg/L 3/3        | 0.038         | 0.021       |         |              |                        |
| Sample + 2 µg/L Avg. | 0.064         | 0.034       | 6.8     | 10.3303      | 2.0661                 |

**Supplementary Information**

Raw data of

**Ultra-trace elemental determination of Si by means of graphite  
furnace-atomic absorption spectrometry**



| Name                 | Signal height | Signal area | RSD / % | Conc. / µg/L | Corrected Conc. / µg/L |
|----------------------|---------------|-------------|---------|--------------|------------------------|
| Sample + 2 µg/L 1/3  | 0.069         | 0.036       |         |              |                        |
| Sample + 2 µg/L 2/3  | 0.060         | 0.032       |         |              |                        |
| Sample + 2 µg/L 3/3  | 0.062         | 0.033       |         |              |                        |
| Sample + 2 µg/L Avg. | 0.077         | 0.041       | 3.2     | 12.6950      | 2.5390                 |
| Sample + 2 µg/L 1/3  | 0.074         | 0.040       |         |              |                        |
| Sample + 2 µg/L 2/3  | 0.076         | 0.041       |         |              |                        |
| Sample + 2 µg/L 3/3  | 0.079         | 0.043       |         |              |                        |
| Sample + 2 µg/L Avg. | 0.058         | 0.031       | 3.1     | 9.2915       | 1.8583                 |
| Sample + 2 µg/L 1/3  | 0.056         | 0.030       |         |              |                        |
| Sample + 2 µg/L 2/3  | 0.060         | 0.031       |         |              |                        |
| Sample + 2 µg/L 3/3  | 0.058         | 0.031       |         |              |                        |
| QC 1 µg/L Avg.       | 0.045         | 0.023       | 8.2     | 6.8963       | 1.3793                 |
| QC 1 µg/L 1/3        | 0.047         | 0.023       |         |              |                        |
| QC 1 µg/L 2/3        | 0.041         | 0.022       |         |              |                        |
| QC 1 µg/L 3/3        | 0.047         | 0.024       |         |              |                        |
| Sample + 3 µg/L Avg. | 0.093         | 0.049       | 0.3     | 15.6096      | 3.1219                 |
| Sample + 3 µg/L 1/3  | 0.093         | 0.049       |         |              |                        |
| Sample + 3 µg/L 2/3  | 0.093         | 0.049       |         |              |                        |
| Sample + 3 µg/L 3/3  | 0.092         | 0.048       |         |              |                        |
| Sample + 3 µg/L Avg. | 0.078         | 0.041       | 1.3     | 12.8844      | 2.5769                 |
| Sample + 3 µg/L 1/3  | 0.077         | 0.041       |         |              |                        |
| Sample + 3 µg/L 2/3  | 0.077         | 0.041       |         |              |                        |
| Sample + 3 µg/L 3/3  | 0.079         | 0.042       |         |              |                        |
| Sample + 3 µg/L Avg. | 0.077         | 0.041       | 1.1     | 12.8233      | 2.5647                 |
| Sample + 3 µg/L 1/3  | 0.076         | 0.041       |         |              |                        |
| Sample + 3 µg/L 2/3  | 0.077         | 0.041       |         |              |                        |
| Sample + 3 µg/L 3/3  | 0.078         | 0.043       |         |              |                        |
| QC 1 µg/L Avg.       | 0.043         | 0.022       | 7.0     | 6.5419       | 1.3084                 |
| QC 1 µg/L 1/3        | 0.044         | 0.022       |         |              |                        |
| QC 1 µg/L 2/3        | 0.040         | 0.021       |         |              |                        |
| QC 1 µg/L 3/3        | 0.045         | 0.024       |         |              |                        |

|                                                                                                                                                                 |                                                                                                                                  |
|-----------------------------------------------------------------------------------------------------------------------------------------------------------------|----------------------------------------------------------------------------------------------------------------------------------|
| <b>Supplementary Information</b><br>Raw data of<br><b>Ultra-trace elemental determination of Si by means of graphite furnace-atomic absorption spectrometry</b> | <br><b>EVONIK</b><br>Leading Beyond Chemistry |
|-----------------------------------------------------------------------------------------------------------------------------------------------------------------|----------------------------------------------------------------------------------------------------------------------------------|

Table 11: Calculations for the Accuracy & Precision experiments.

| Name                 | Accuracy          | Precision |        |         |
|----------------------|-------------------|-----------|--------|---------|
|                      | Recovery Rate / % | Avg. / %  | SD / % | RSD / % |
| Sample + 1 µg/L Avg. | 90                | 82        | 9      | 11      |
| Sample + 1 µg/L Avg. | 84                |           |        |         |
| Sample + 1 µg/L Avg. | 72                |           |        |         |
| Sample + 2 µg/L Avg. | 102               | 106       | 20     | 19      |
| Sample + 2 µg/L Avg. | 127               |           |        |         |
| Sample + 2 µg/L Avg. | 88                |           |        |         |
| Sample + 3 µg/L Avg. | 103               | 89        | 12     | 14      |
| Sample + 3 µg/L Avg. | 82                |           |        |         |
| Sample + 3 µg/L Avg. | 81                |           |        |         |

### 3.3 Limit of detection, limit of quantitation

Table 12: Raw data & calculations for the determinations of the LOD and LOQ, respectively, by means of the blank method. Values below the bold line refer to calculations.

| Name                                | Value  |
|-------------------------------------|--------|
| Blank 1                             | 0.0048 |
| Blank 2                             | 0.0036 |
| Blank 3                             | 0.0026 |
| Blank 4                             | 0.0039 |
| Blank 5                             | 0.0037 |
| Blank 6                             | 0.0030 |
| Blank 7                             | 0.0032 |
| Blank 8                             | 0.0040 |
| Blank 9                             | 0.0036 |
| Blank 10                            | 0.0032 |
| Mean                                | 0.0036 |
| Standard deviation                  | 0.0006 |
| Concentrating factor                | 5      |
| LOD / µg/L                          | 0.333  |
| LOQ / µg/L                          | 1.110  |
| LOD WRT concentrating factor / µg/L | 0.067  |
| LOQ WRT concentrating factor / µg/L | 0.222  |

**Supplementary Information**

Raw data of

**Ultra-trace elemental determination of Si by means of graphite furnace-atomic absorption spectrometry**



**3.4 Stability of solution**

Table 13: Raw data for the Stability of Solution.

| Name            | Signal height | Signal area | RSD / % | Conc. / µg/L | Corrected Conc. / µg/L |
|-----------------|---------------|-------------|---------|--------------|------------------------|
| Blank Avg.      | 0.005         | 0.003       | 6.5     | 0            |                        |
| Blank 1/3       | 0.006         | 0.003       |         |              |                        |
| Blank 2/3       | 0.005         | 0.003       |         |              |                        |
| Blank 3/3       | 0.238         | 0.091       |         |              |                        |
| Standard 1 Avg. | 0.024         | 0.012       | 16.3    | 1.9717       |                        |
| Standard 1 1/3  | 0.029         | 0.014       |         |              |                        |
| Standard 1 2/3  | 0.023         | 0.011       |         |              |                        |
| Standard 1 3/3  | 0.021         | 0.010       |         |              |                        |
| Standard 2 Avg. | 0.038         | 0.019       | 2.5     | 5.1757       |                        |
| Standard 2 1/3  | 0.037         | 0.018       |         |              |                        |
| Standard 2 2/3  | 0.039         | 0.019       |         |              |                        |
| Standard 2 3/3  | 0.039         | 0.020       |         |              |                        |
| Standard 3 Avg. | 0.052         | 0.026       | 12.1    | 7.1474       |                        |
| Standard 3 1/3  | 0.059         | 0.028       |         |              |                        |
| Standard 3 2/3  | 0.047         | 0.024       |         |              |                        |
| Standard 3 3/3  | 0.049         | 0.024       |         |              |                        |
| Standard 4 Avg. | 0.062         | 0.031       | 2.2     | 9.8584       |                        |
| Standard 4 1/3  | 0.061         | 0.030       |         |              |                        |
| Standard 4 2/3  | 0.061         | 0.030       |         |              |                        |
| Standard 4 3/3  | 0.063         | 0.032       |         |              |                        |
| Standard 5 Avg. | 0.094         | 0.047       | 4.1     | 15.0341      |                        |
| Standard 5 1/3  | 0.092         | 0.046       |         |              |                        |
| Standard 5 2/3  | 0.098         | 0.049       |         |              |                        |
| Standard 5 3/3  | 0.092         | 0.046       |         |              |                        |
| Standard 6 Avg. | 0.115         | 0.059       | 3.7     | 19.9633      |                        |
| Standard 6 1/3  | 0.112         | 0.057       |         |              |                        |
| Standard 6 2/3  | 0.112         | 0.058       |         |              |                        |
| Standard 6 3/3  | 0.120         | 0.060       |         |              |                        |
| Standard 7 Avg. | 0.136         | 0.070       | 1.9     | 24.8926      |                        |
| Standard 7 1/3  | 0.138         | 0.070       |         |              |                        |
| Standard 7 2/3  | 0.138         | 0.071       |         |              |                        |
| Standard 7 3/3  | 0.133         | 0.069       |         |              |                        |
| QC 1 µg/L Avg.  | 0.046         | 0.024       | 16.9    | 6.7494       | 1.3499                 |



**Supplementary Information**

Raw data of

**Ultra-trace elemental determination of Si by means of graphite furnace-atomic absorption spectrometry**



| Name                 | Signal height | Signal area | RSD / % | Conc. / µg/L | Corrected Conc. / µg/L |
|----------------------|---------------|-------------|---------|--------------|------------------------|
| QC 1 µg/L 1/3        | 0.043         | 0.023       |         |              |                        |
| QC 1 µg/L 2/3        | 0.041         | 0.022       |         |              |                        |
| QC 1 µg/L 3/3        | 0.055         | 0.026       |         |              |                        |
| Sample Avg.          | 0.024         | 0.012       | 20.4    | 2.4435       | 0.4887                 |
| Sample 1/3           | 0.021         | 0.010       |         |              |                        |
| Sample 2/3           | 0.022         | 0.011       |         |              |                        |
| Sample 3/3           | 0.030         | 0.014       |         |              |                        |
| Sample Avg.          | 0.021         | 0.009       | 6.8     | 1.8183       | 0.3637                 |
| Sample 1/3           | 0.022         | 0.010       |         |              |                        |
| Sample 2/3           | 0.020         | 0.009       |         |              |                        |
| Sample 3/3           | 0.089         | 0.035       |         |              |                        |
| Sample Avg.          | 0.026         | 0.011       | 42.1    | 2.7400       | 0.5480                 |
| Sample 1/3           | 0.014         | 0.007       |         |              |                        |
| Sample 2/3           | 0.035         | 0.016       |         |              |                        |
| Sample 3/3           | 0.028         | 0.012       |         |              |                        |
| QC 1 µg/L Avg.       | 0.042         | 0.020       | 58.3    | 5.9888       | 1.1978                 |
| QC 1 µg/L 1/3        | 0.018         | 0.009       |         |              |                        |
| QC 1 µg/L 2/3        | 0.041         | 0.021       |         |              |                        |
| QC 1 µg/L 3/3        | 0.068         | 0.029       |         |              |                        |
| Sample + 2 µg/L Avg. | 0.084         | 0.041       | 1.6     | 14.1172      | 2.8234                 |
| Sample + 2 µg/L 1/3  | 0.085         | 0.040       |         |              |                        |
| Sample + 2 µg/L 2/3  | 0.083         | 0.041       |         |              |                        |
| Sample + 2 µg/L 3/3  | 0.086         | 0.042       |         |              |                        |
| Sample + 2 µg/L Avg. | 0.064         | 0.031       | 5.7     | 10.1078      | 2.0216                 |
| Sample + 2 µg/L 1/3  | 0.061         | 0.029       |         |              |                        |
| Sample + 2 µg/L 2/3  | 0.063         | 0.031       |         |              |                        |
| Sample + 2 µg/L 3/3  | 0.068         | 0.032       |         |              |                        |
| Sample + 2 µg/L Avg. | 0.053         | 0.026       | 1.7     | 7.9355       | 1.5871                 |
| Sample + 2 µg/L 1/3  | 0.054         | 0.027       |         |              |                        |
| Sample + 2 µg/L 2/3  | 0.052         | 0.026       |         |              |                        |
| Sample + 2 µg/L 3/3  | 0.052         | 0.026       |         |              |                        |
| QC 1 µg/L Avg.       | 0.042         | 0.020       | 35.7    | 5.8148       | 1.1630                 |

|                                                                                                                                                                 |                                                                                                                                  |
|-----------------------------------------------------------------------------------------------------------------------------------------------------------------|----------------------------------------------------------------------------------------------------------------------------------|
| <b>Supplementary Information</b><br>Raw data of<br><b>Ultra-trace elemental determination of Si by means of graphite furnace-atomic absorption spectrometry</b> | <br><b>EVONIK</b><br>Leading Beyond Chemistry |
|-----------------------------------------------------------------------------------------------------------------------------------------------------------------|----------------------------------------------------------------------------------------------------------------------------------|

| Name          | Signal height | Signal area | RSD / % | Conc. / µg/L | Corrected Conc. / µg/L |
|---------------|---------------|-------------|---------|--------------|------------------------|
| QC 1 µg/L 1/3 | 0.033         | 0.016       |         |              |                        |
| QC 1 µg/L 2/3 | 0.033         | 0.018       |         |              |                        |
| QC 1 µg/L 3/3 | 0.059         | 0.026       |         |              |                        |

Table 14: Calculations for the Stability of Solution.

| Name                 | Accuracy          | Precision |        |         |
|----------------------|-------------------|-----------|--------|---------|
|                      | Recovery Rate / % | Avg. / %  | SD / % | RSD / % |
| Sample + 2 µg/L Avg. | 102               | 106       | 20     | 19      |
| Sample + 2 µg/L Avg. | 127               |           |        |         |
| Sample + 2 µg/L Avg. | 88                |           |        |         |
